# Supplementary material
Source: Elsevier journal article supplement (https://www.sciencedirect.com/science/article/pii/S0213911121003174)
Supplement: mmc1 [file S0213911121003174:mmc1.doc]

**Apéndice**

**Tabla I**

Factores asociados a infección por SARS-CoV-2 en profesionales sanitarios (n = 624)

|  | | | **Casos COVID-19 (n = 43)**  **n (%)** | **No casos COVID-19 (n = 581)**  **n (%)** | **OR (IC95%)** | **p** | **ORaa (IC95%)** | **p** |
| --- | --- | --- | --- | --- | --- | --- | --- | --- |
| *Estado vacunal* | | |  |  |  |  |  |  |
| Pauta completa | | | 2 (4,7) | 253 (43,5) | 0,04 (0,01-0,18) | <0,001 | 0,04 (0,01-0,17) | <0,001 |
| Pauta incompleta | | | 24 (55,8) | 239 (41,1) | 0,53 (0,27-1,03) | 0,059 | 0,32 (0,15-0,70) | 0,004 |
| No vacunado | | | 17 (39,5) | 89 (15,3) | 1 |  | 1 |  |
|  | | |  |  |  |  |  |  |
| *Sexo (mujer)* | | | 33 (76,7) | 442 (76,1) | 0,96 (0,46-2,00) | 0,921 | - | - |
|  | | |  |  |  |  |  |  |
| *Edad (<40 años)* | | | 14 (32,6) | 267 (46,0) | 0,57 (0,29-1,10) | 0,092 | - | - |
|  | | |  |  |  |  |  |  |
| *Motivo de estudio* | | |  |  |  |  |  |  |
| Sospecha de enfermedad | | | 22 (51,2) | 514 (88,5) | 0,14 (0,07-0,26) | <0,001 | 0,10 (0,05-0,22) | <0,001 |
| Estudio de contactos | | | 21 (46,8) | 67 (11,5) | 1 |  | 1 |  |
|  | | |  |  |  |  |  |  |
| *Antecedente de COVID-19 >90 días* | | | 1 (2,3) | 36 (6,2) | 0,36 (0,05-2,70) | 0,320 | - | - |
|  | | |  |  |  |  |  |  |
| *Estamento* | | |  |  |  |  |  |  |
| Facultativo | | | 3 (7,0) | 134 (23,1) | 0,18 (0,05-0,64) | 0,008 | 0,19 (0,05-0,76) | 0,019 |
| Enfermería | | | 10 (23,3) | 219 (37,7) | 0,36 (0,15-0,86) | 0,021 | 0,31 (0,12-0,82) | 0,019 |
| Auxiliar/técnico | | | 18 (41,9) | 134 (23,1) | 1,05 (0,48-2,29) | 0,898 | 0,85 (0,35-2,03) | 0,710 |
| Otrosb | | | 12 (27,9) | 94 (16,2) | 1 |  | 1 |  |
|  | | |  |  |  |  |  |  |
| *Servicio* | | |  |  |  |  |  |  |
| Urgencias generales | | | 7 (16,3) | 34 (5,9) | 2,20 (0,78-6,23) | 0,137 | - | - |
| Unidades de cuidados críticosc | | | 2 (4,7) | 57 (9,8) | 0,38 (0,08-1,77) | 0,216 |  |  |
| Hospitalización (adultos y pediatría) | | | 19 (44,2) | 335 (57,7) | 0,61 (0,27-1,35) | 0,219 |  |  |
| Atención primaria | | | 5 (11,6) | 48 (8,3) | 1,12 (0,36-3,44) | 0,850 |  |  |
| Hospitalización no COVID-19d | | | 10 (23,3) | 107 (18,4) | 1 |  |  |  |

OR: *odds ratio* cruda; ORa: OR ajustada; IC95%: intervalo de confianza del 95%.

a Ajustada por vacunación, motivo de estudio y estamento.

b Celadores, personal administrativo y fisioterapeutas.

c Unidad de cuidados críticos médicos), unidad de cuidados críticos quirúrgicos y quirófanos.

d Hospitalización quirúrgica de adultos, áreas administrativas y servicios centrales (laboratorio, microbiología, farmacia, radiología y banco de sangre).
